# Supplementary material for: Aromatization of n-C7–n-C9 alkanes on a Pt/KZSM-5(deAl) catalyst
Source: Royal Society of Chemistry journal article supplement (doi:10.1039/d2cy01903e), 2022-12-12
Supplement: d2cy01903e1.pdf [file d2cy01903e1.pdf]

## Electronic Supplementary Information (ESI)

### **Aromatization of n-C<sub>7</sub> ~ n-C<sub>9</sub> Alkanes on Pt/KZSM-5(deAl) Catalyst**

Qiuming Zhou<sup>a,b</sup>, Sen Wang<sup>\*,a</sup>, Zhiwei Wu<sup>a</sup>, Zhangfeng Qin<sup>a</sup>, Mei Dong<sup>a</sup>, Jianguo Wang<sup>a,b</sup>,  
Weibin Fan<sup>\*,a</sup>

<sup>a</sup>State Key Laboratory of Coal Conversion, Institute of Coal Chemistry, Chinese Academy of Sciences, P.O. Box 165, Taiyuan, Shanxi 030001, P. R. China

<sup>b</sup>University of Chinese Academy of Sciences, Beijing 100049, P. R. China

\* *Corresponding authors.* +86 351 4199009. Fax: +86 351 4041153. *E-mail address:*  
*wangsen@sxicc.ac.cn (S. Wang); fanwb@sxicc.ac.cn (W. Fan)*

**Table S1.** Catalytic results for n-heptane aromatization over different Pt/ZSM-5 catalysts.

| Performance                    | Catalysts |                 |                 |
|--------------------------------|-----------|-----------------|-----------------|
|                                | Pt/HZSM-5 | Pt/HZSM-5(deAl) | Pt/KZSM-5(deAl) |
| Conversion                     | 93.4      | 96.2            | 97.6            |
| Methane                        | 14.3      | 12.7            | 9.50            |
| C <sub>2</sub> -C <sub>6</sub> | 63.1      | 54.4            | 9.30            |
| C <sub>7</sub> -isomers        | 1.70      | 1.53            | 1.32            |
| C <sub>7</sub> -alkenes        | 3.30      | 2.53            | 1.56            |
| Total Aromatics                | 17.0      | 28.7            | 75.3            |

Reaction conditions: 550 °C, WHSV of 2 h<sup>-1</sup>, TOS = 12 h, ambient pressure and H<sub>2</sub>/n-alkane of 6/1.

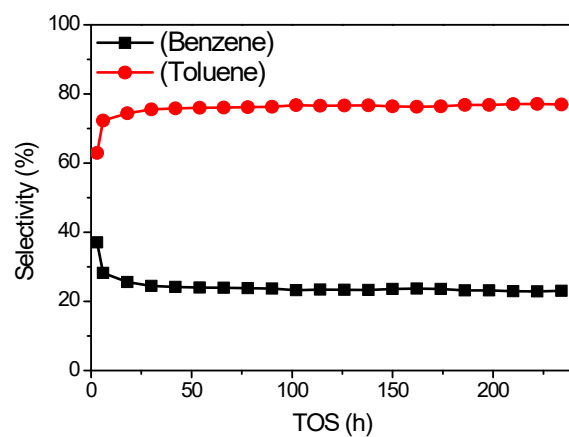

**Fig. S1** Distribution of aromatic products in n-heptane aromatization at different reaction times over Pt/KZSM-5(deAl) catalyst.

**Table S2.** Catalytic results for different n-alkanes aromatization over Pt/KZSM-5(deAl).

|                       | Alkanes aromatization |          |          |
|-----------------------|-----------------------|----------|----------|
|                       | n-heptane             | n-octane | n-nonane |
| Conversion            | 96.1                  | 92.8     | 87.1     |
| Methane               | 9.40                  | 6.70     | 8.30     |
| Crackate <sup>a</sup> | 7.60                  | 6.50     | 5.90     |
| Isomers               | 2.96                  | 1.40     | 1.10     |
| Alkenes               | 2.70                  | 1.30     | 1.20     |
| Total Aros            | 75.4                  | 82.7     | 83.4     |

<sup>a</sup>Crackate represents C<sub>2</sub>-C<sub>6</sub> alkanes for n-heptane aromatization, C<sub>2</sub>-C<sub>7</sub> alkanes for n-octane aromatization and C<sub>2</sub>-C<sub>8</sub> alkanes for n-nonane aromatization, respectively.

Reaction conditions: 550 °C, WHSV of 2 h<sup>-1</sup>, TOS = 18 h, ambient pressure and H<sub>2</sub>/n-alkane of 6/1.

**Table S3.** Elemental composition of various Pt/ZSM-5 catalysts.

| Samples         | Si/Al | Pt (wt%) | K (wt%) | Al <sub>EF</sub> /Al <sub>F</sub> |
|-----------------|-------|----------|---------|-----------------------------------|
| Pt/HZSM-5       | 27.0  | 0.71     | --      | 0.053                             |
| Pt/HZSM-5(deAl) | 60.2  | 0.65     | --      | 0.068                             |
| Pt/KZSM-5(deAl) | 58.6  | 0.69     | 3.28    | 0.069                             |

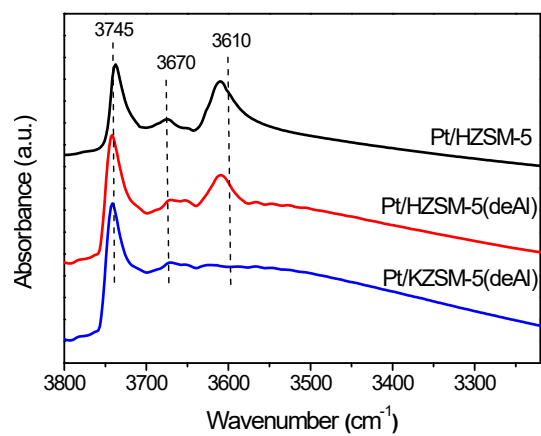

**Fig. S2** FT-IR spectra in the OH-stretching region of various Pt/ZSM-5 catalysts.

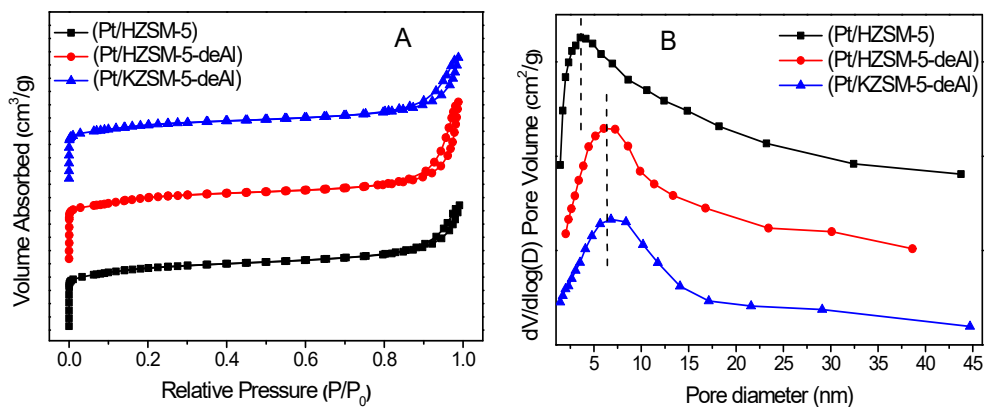

**Fig. S3** N<sub>2</sub> adsorption-desorption isotherms (A) and corresponding pore size distributions of various Pt/ZSM-5 catalysts.

**Table S4.** Acidic properties of various Pt/ZSM-5 catalysts.

| Sample          | Acid sites content tested by NH <sub>3</sub> -TPD |                         |                         | Acid sites content tested by Py-IR |                         |
|-----------------|---------------------------------------------------|-------------------------|-------------------------|------------------------------------|-------------------------|
|                 | Weak                                              | Strong                  | Total                   | Brönsted                           | Lewis                   |
|                 | (mmol·g <sup>-1</sup> )                           | (mmol·g <sup>-1</sup> ) | (mmol·g <sup>-1</sup> ) | (mmol·g <sup>-1</sup> )            | (mmol·g <sup>-1</sup> ) |
| Pt/HZSM-5       | 0.41                                              | 0.30                    | 0.71                    | 0.153                              | 0.071                   |
| Pt/HZSM-5(deAl) | 0.26                                              | 0.19                    | 0.45                    | 0.115                              | 0.051                   |
| Pt/KZSM-5(deAl) | 0.23                                              | 0.04                    | 0.27                    | 0.036                              | 0.204                   |



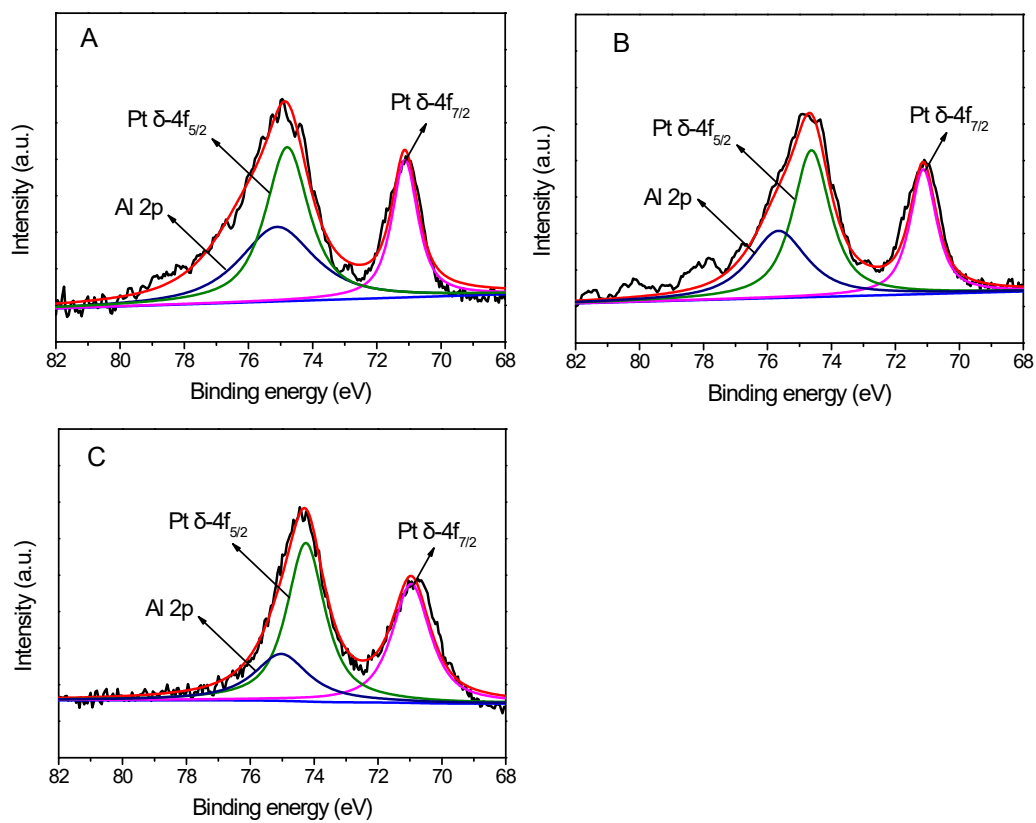

**Fig. S4** Pt4f XPS of Pt/HZSM-5 (A), Pt/HZSM-5(deAl) (B) and Pt/KZSM-5(deAl) (C) catalysts after H<sub>2</sub> reduction.

**Table S5.** Binding energy of various Pt/ZSM-5 and KZSM-5 catalysts.

| Samples         | Pt $\delta$ -4f <sub>5/2</sub> | Pt $\delta$ -4f <sub>7/2</sub> | K2p <sub>3/2</sub> | K2p <sub>1/2</sub> |
|-----------------|--------------------------------|--------------------------------|--------------------|--------------------|
| Pt/HZSM-5       | 74.6                           | 71.2                           | --                 | --                 |
| Pt/HZSM-5(deAl) | 74.4                           | 71.1                           | --                 | --                 |
| Pt/KZSM-5(deAl) | 74.2                           | 70.9                           | 297.6              | 294.7              |
| KZSM-5          | --                             | --                             | 297.4              | 294.5              |

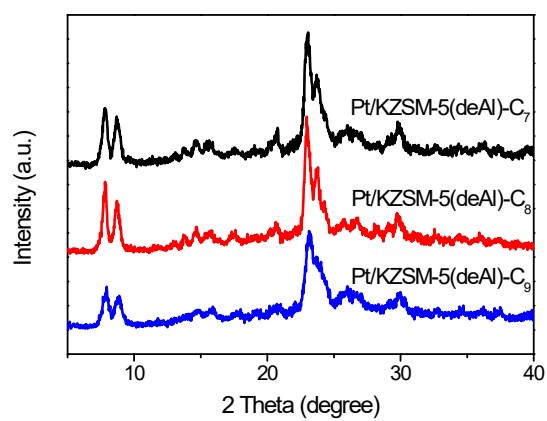

**Fig. S5** XRD patterns of spent Pt/KZSM-5(deAl) after n-heptane (Pt/KZSM-5(deAl)-C<sub>7</sub>), n-octane (Pt/KZSM-5(deAl)-C<sub>8</sub>) and n-nonane (Pt/KZSM-5(deAl)-C<sub>9</sub>) aromatization.

**Table S6.** Coking rate of spent Pt/KZSM-5(deAl) catalysts.

| Samples                        | Reaction time (h) | Coking amount (%) | Coking Rate (%) |
|--------------------------------|-------------------|-------------------|-----------------|
| Pt/KZSM-5(deAl)-C <sub>7</sub> | 234               | 25.7              | 0.11            |
| Pt/KZSM-5(deAl)-C <sub>8</sub> | 102               | 19.1              | 0.19            |
| Pt/KZSM-5(deAl)-C <sub>9</sub> | 88                | 20.6              | 0.23            |

**Table S7.** Relative band intensity in Raman spectra of Pt/KZSM-5(deAl) catalysts after different n-alkanes aromatization for 24 h.

| Sample                             | I <sub>G</sub> /(%) | I <sub>D</sub> /(%) | I <sub>D</sub> /I <sub>G</sub> |
|------------------------------------|---------------------|---------------------|--------------------------------|
| Pt/KZSM-5(deAl)-C <sub>7</sub> -24 | 34.8                | 65.2                | 1.87                           |
| Pt/KZSM-5(deAl)-C <sub>8</sub> -24 | 37.3                | 62.7                | 1.68                           |
| Pt/KZSM-5(deAl)-C <sub>9</sub> -24 | 39.5                | 60.5                | 1.53                           |
